# Supplementary material for: Formation of uniformly sized metal oxide nanocuboids in the presence of precursor grains in an apolar medium
Source: Royal Society of Chemistry journal article supplement (doi:10.1039/c5ce01257k), 2015-01-01
Supplement: c5ce01257k1.pdf [file c5ce01257k1.pdf]

## **Supporting Information**

### **Formation of Uniformly Sized Metal Oxide Nanocuboids in the Presence of Precursor Grains in an Apolar Medium**

*Yoshitaka Nakagawa, Hiroyuki Kageyama, Riho Matsumoto, Yuya Oaki,  
and Hiroaki Imai\**

Department of Applied Chemistry, Faculty of Science and Technology, Keio University,  
3-14-1 Hiyoshi, Kohoku-ku, Yokohama 223-8522, Japan

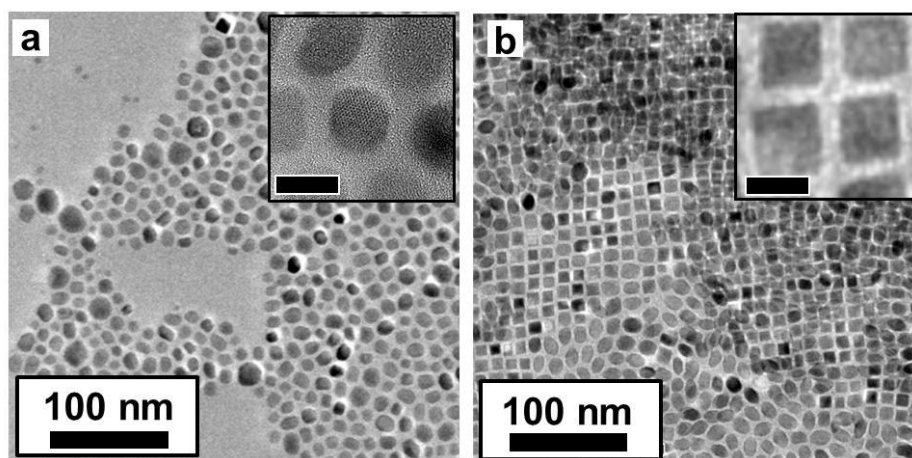

**Fig. S1** TEM images of  $\text{Mn}_3\text{O}_4$  nanocrystals obtained by the amount of oleic acid lower (3.62 mmol) (a) or higher (4.82 mmol) (b) than the standard condition (Scale bars of insets are 10 nm.).

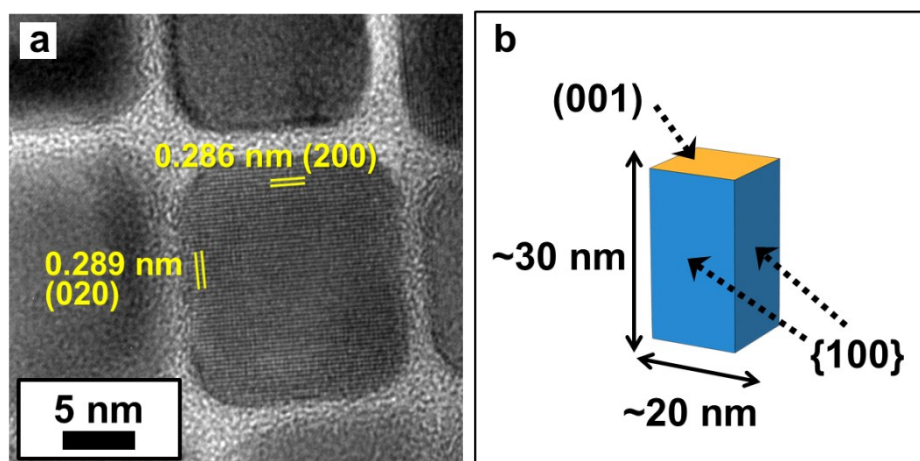

**Fig. S2** HRTEM image of  $\text{Mn}_3\text{O}_4$  rectangular nanoblocks obtained by addition of twice the amounts of the manganese sources (1.20 mmol), oleic acid (7.94 mmol), and *tert*-butylamine (4.62 mmol) (a). Schematic illustration of the  $\text{Mn}_3\text{O}_4$  rectangular nanoblock (b).
